# Supplementary material for: Real-world prevalence, treatment and survival of “high risk” early breast cancer, with mandatory testing of gBRCA1/2 mutation according to the OlympiA trial inclusion criteria: Data from a population-based registry
Source: PubMed Central journal article supplement — Breast. 2024 Aug 28;78:103789. doi: 10.1016/j.breast.2024.103789 (PMC11406442; doi:10.1016/j.breast.2024.103789), 2024-08-28
Supplement: mmc2.pdf [file mmc2.pdf]

# Supplemental Figure 2

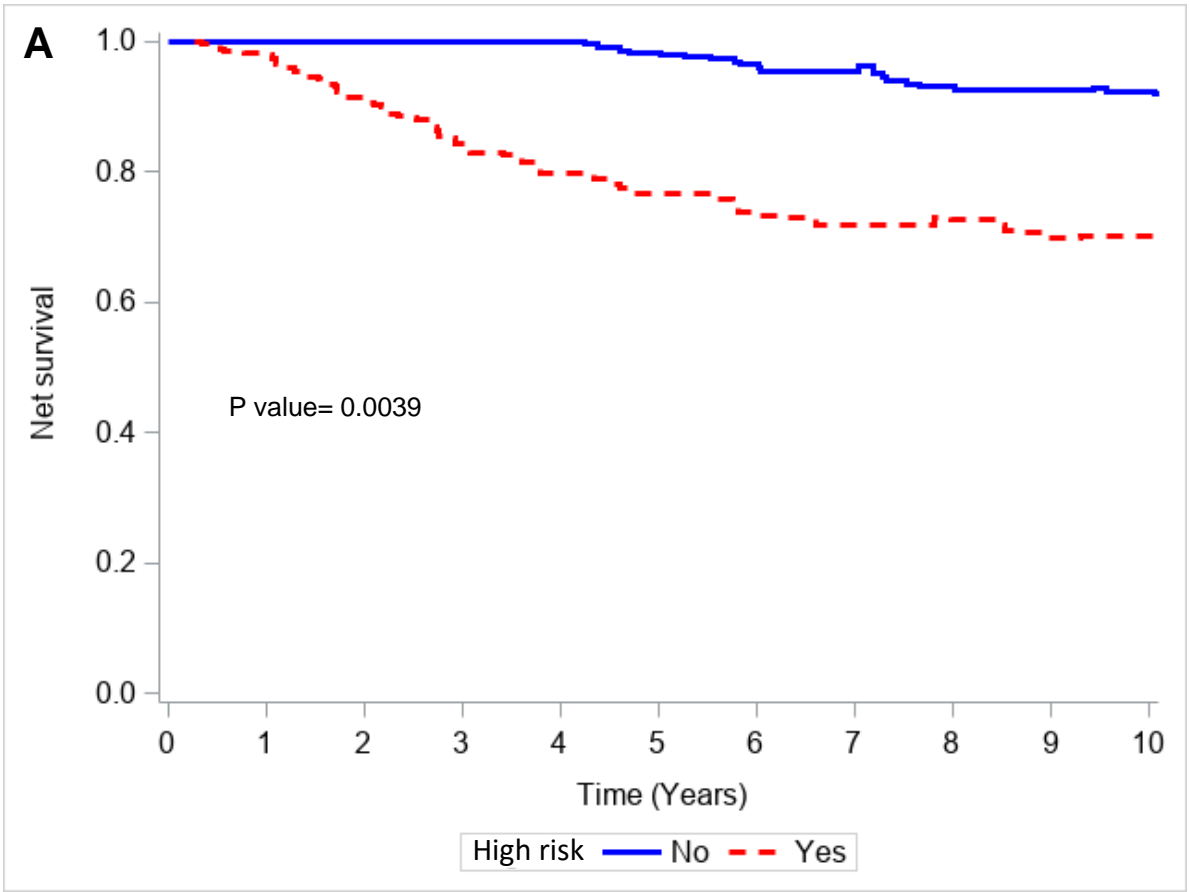

| net survival | High risk (OlympiA criteria) |                     |
|--------------|------------------------------|---------------------|
|              | Yes (N=211)                  | No (N=169)          |
| 1-year OS    | 98.3% [95.8 – 100]           | 100%                |
| 2-year OS    | 91.1% [86.6 – 95.9]          | 100%                |
| 3-year OS    | 84.3% [78.7 – 90.3]          | 100%                |
| 5-year OS    | 76.6% [69.5 – 84.3]          | 98.2% [94.8 – 100]  |
| 10-year OS   | 72.1% [62.9 – 82.8]          | 92.8% [86.2 – 99.8] |

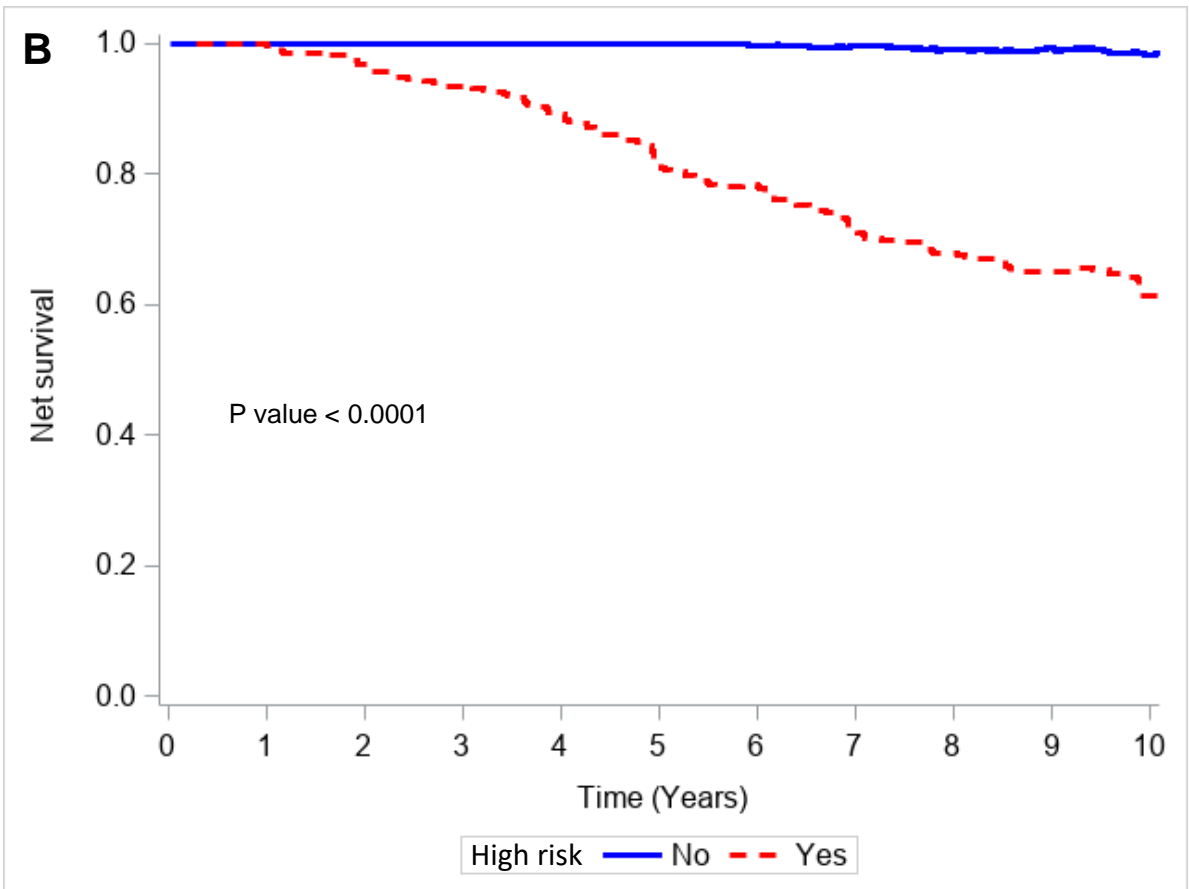

| net survival | High risk (OlympiA criteria) |                    |
|--------------|------------------------------|--------------------|
|              | Yes (N=283)                  | No (N=2820)        |
| 1-year OS    | 100%                         | 100%               |
| 2-year OS    | 97 % [94.3 – 99.8]           | 100%               |
| 3-year OS    | 93.6% [90 – 97.4]            | 100%               |
| 5-year OS    | 82.4% [77– 88.1]             | 100%               |
| 10-year OS   | 61.5% [53.9 – 70.1]          | 98.4% [96.2 – 100] |
