# Supplementary material for: Real-world prevalence, treatment and survival of “high risk” early breast cancer, with mandatory testing of gBRCA1/2 mutation according to the OlympiA trial inclusion criteria: Data from a population-based registry
Source: PubMed Central journal article supplement — Breast. 2024 Aug 28;78:103789. doi: 10.1016/j.breast.2024.103789 (PMC11406442; doi:10.1016/j.breast.2024.103789), 2024-08-28
Supplement: mmc3.pdf [file mmc3.pdf]

# Supplemental Figure 3

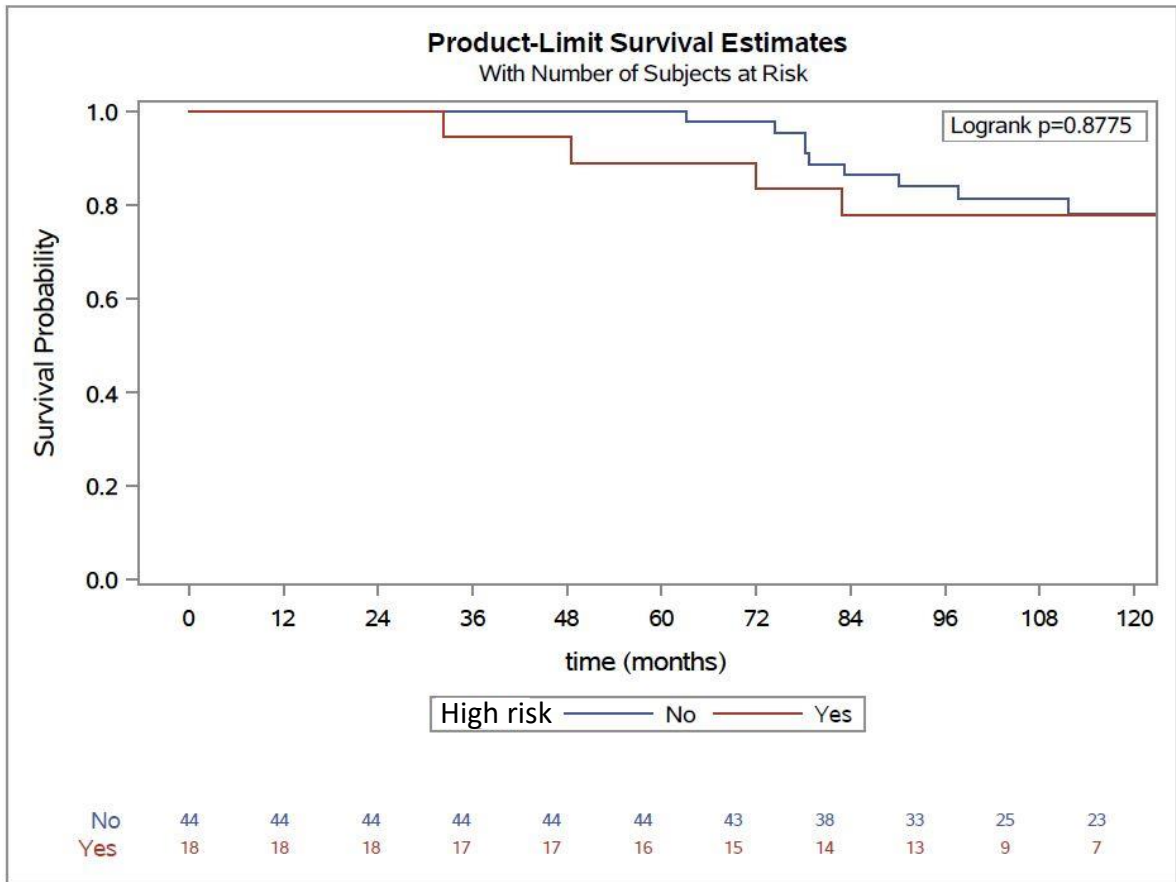

|                           | High risk (OlympiA criteria) gBRCA1/2 patients |                       |
|---------------------------|------------------------------------------------|-----------------------|
|                           | Yes (N=18)                                     | No (N=44)             |
| Median OS (months)        | 133.9 [118.6 – 180.1]                          | Not reached           |
| Median follow-up (months) | 144.1 [136.8 – 147.5]                          | 144.7 [142.8 – 147.4] |
| Events (%)                | 4 (22.2)                                       | 10 (22.7)             |
| 2-year OS                 | 100%                                           | 100%                  |
| 3-year OS                 | 94.4% [66.6 – 99.2]                            | 100%                  |
| 5-year OS                 | 88.9% [62.4 – 97.1]                            | 100%                  |
| 10-year OS                | 77.8% [51.1 – 91]                              | 77.9% [61.6 – 88]     |
