# Supplementary figures and images for: Real-world prevalence, treatment and survival of “high risk” early breast cancer, with mandatory testing of gBRCA1/2 mutation according to the OlympiA trial inclusion criteria: Data from a population-based registry
Source: PubMed Central journal article supplement — Breast. 2024 Aug 28;78:103789. doi: 10.1016/j.breast.2024.103789 (PMC11406442; doi:10.1016/j.breast.2024.103789), 2024-08-28

# Supplemental Figure 4

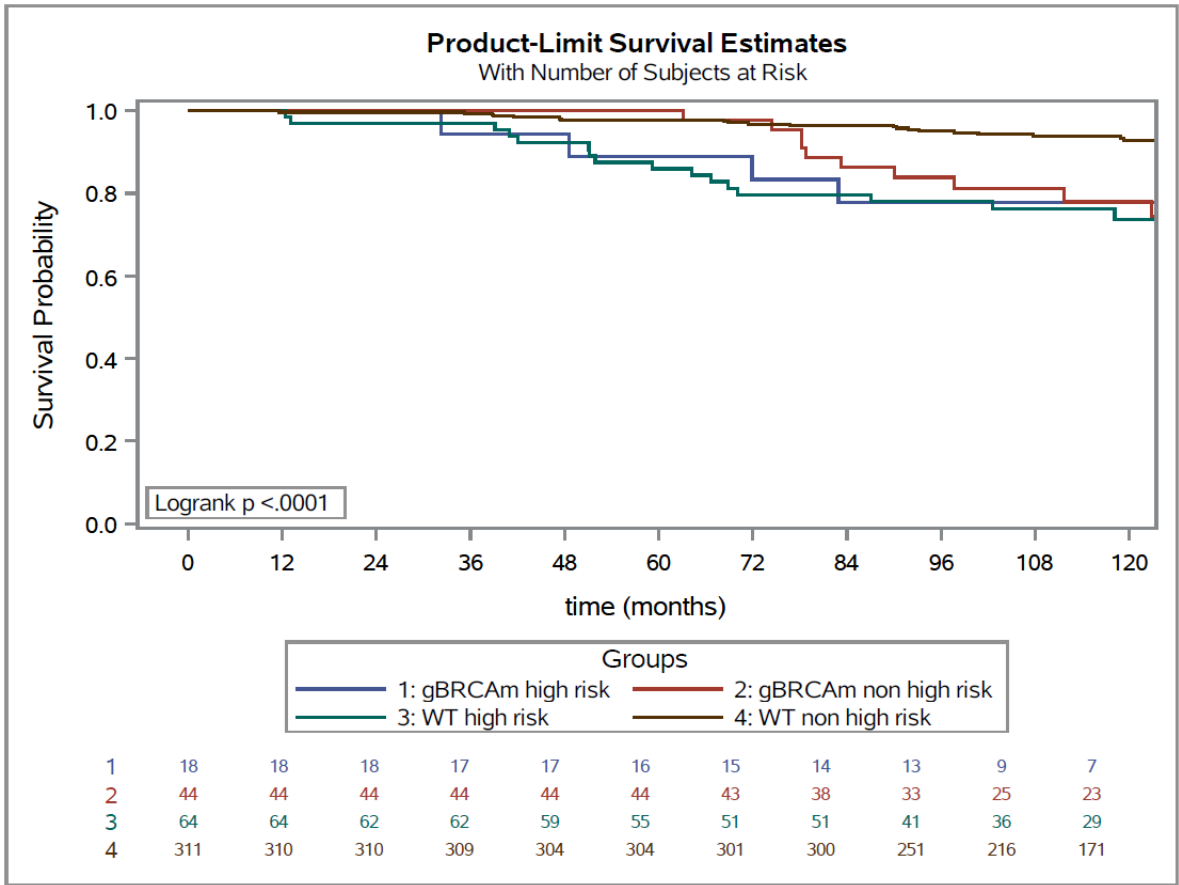

Supplement: mmc4.pdf [file mmc4.pdf]
